# Supplementary material for: Pan-class I PI3-kinase inhibitor BKM120 induces MEK1/2-dependent mitotic catastrophe in non-Hodgkin lymphoma leading to apoptosis or polyploidy determined by Bax/Bak and p53
Source: PubMed Central journal article supplement (PMC5841308; doi:10.1038/s41419-018-0413-4), 2018-03-07
Supplement: 41419_2018_413_MOESM3_ESM.pdf [file 41419_2018_413_MOESM3_ESM.pdf]

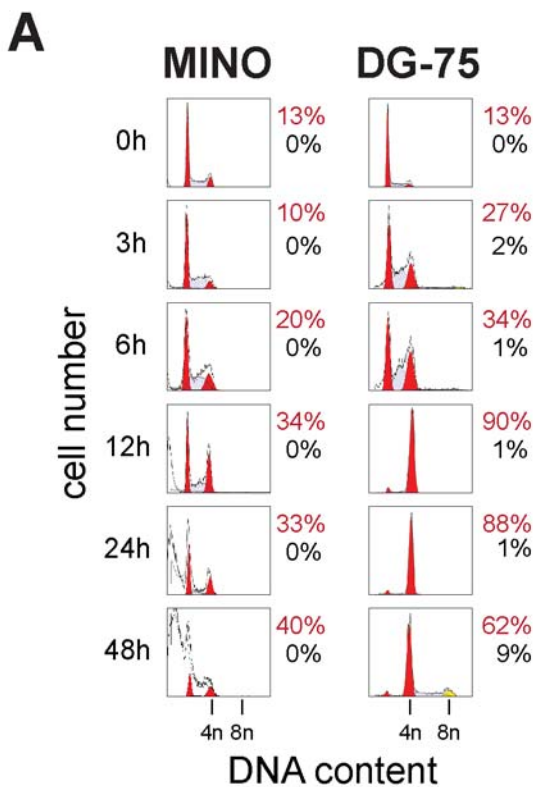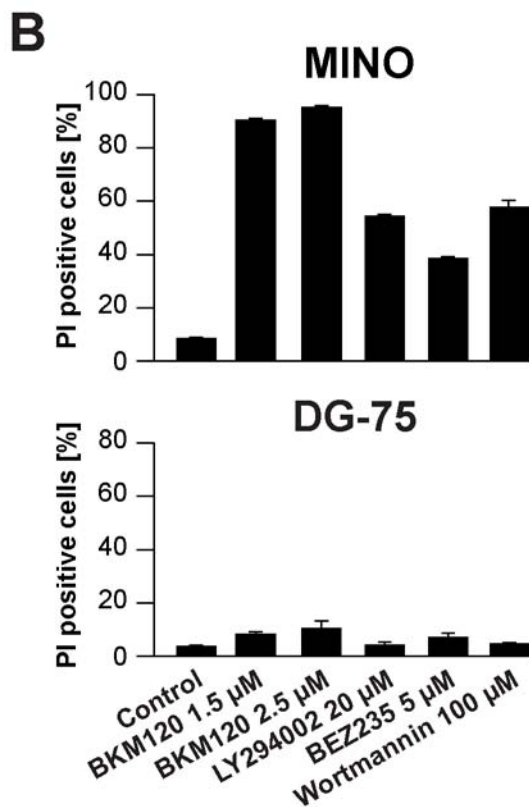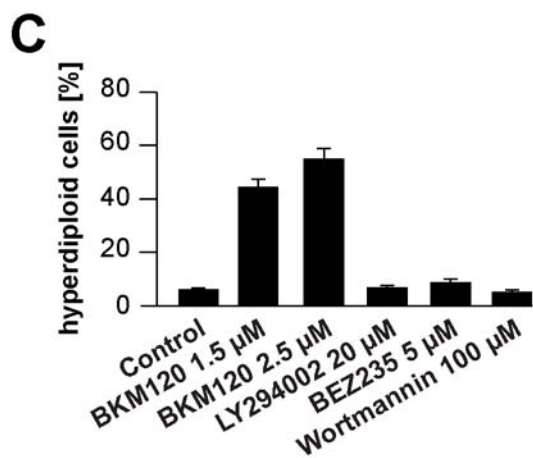

Figure S3
